# Supplementary material for: The Starch Physicochemical Properties between Superior and Inferior Grains of Japonica Rice under Panicle Nitrogen Fertilizer Determine the Difference in Eating Quality
Source: MDPI journal article supplement (doi:10.3390/foods11162489), 2022-08-17
Supplement: s1 [file s1]

# Supplementary materials

**Table S1** Variance analysis of nitrogen (N) ,variety (V) and position (P) effect on the content of starch, protein and crude fat.

| Index                                  | Nitrogen  | Variety            | Position  | N×V                | N×P                | V×P                | N×V×P              |
|----------------------------------------|-----------|--------------------|-----------|--------------------|--------------------|--------------------|--------------------|
| Degree of freedom                      | 3         | 1                  | 1         | 3                  | 3                  | 1                  | 3                  |
| Starch content (%)                     | 138.84**  | 75.59**            | 56.48**   | 6.96**             | 2.62 <sup>NS</sup> | 0.12 <sup>NS</sup> | 2.64 <sup>NS</sup> |
| Amylose content (%)                    | 236.19**  | 10710.93**         | 447.11**  | 0.35 <sup>NS</sup> | 0.94 <sup>NS</sup> | 142.84**           | 1.96 <sup>NS</sup> |
| Amylopectin content (%)                | 117.62**  | 833.61**           | 1056.74** | 6.79**             | 15.71**            | 83.54**            | 2.26 <sup>NS</sup> |
| Amylose/ amylopectin                   | 314.28**  | 23118.39**         | 8738.45** | 2.57 <sup>NS</sup> | 19.91**            | 2893.36**          | 25.00**            |
| Total protein content (%)              | 7860.92** | 99.37**            | 8526.15** | 67.61**            | 330.57**           | 377.56**           | 119.30**           |
| Albumin content (mg g <sup>-1</sup> )  | 117.32**  | 465.22**           | 392.55**  | 0.87 <sup>NS</sup> | 1.00 <sup>NS</sup> | 23.16**            | 0.30 <sup>NS</sup> |
| Globulin content (mg g <sup>-1</sup> ) | 163.67**  | 4.27 <sup>NS</sup> | 254.26**  | 2.69 <sup>NS</sup> | 5.46**             | 19.10**            | 3.81*              |
| Prolamin content (mg g <sup>-1</sup> ) | 427.72**  | 55.15**            | 67.46**   | 44.80**            | 7.82**             | 0.00 <sup>NS</sup> | 1.55 <sup>NS</sup> |
| Glutelin content (mg g <sup>-1</sup> ) | 207.67**  | 29.10**            | 444.14**  | 199.06**           | 20.48**            | 1.36 <sup>NS</sup> | 14.56**            |
| Crude fat content (%)                  | 1308.92** | 295.71**           | 8232.16** | 3.30 <sup>NS</sup> | 110.79**           | 1028.08**          | 10.77**            |

\*F-value significant at the 0.05 probability level. \*\* F-value significant at the 0.01 probability level. NS means no significant at  $P=0.05$ .

**Table S2** Variance analysis of nitrogen (N), variety (V) and position (P) effect on starch granule size distribution, amylopectin chain length distribution and crystalline structure.

| Index                      | Nitrogen           | Variety            | Position           | N×V                | N×P                | V×P                | N×V×P              |
|----------------------------|--------------------|--------------------|--------------------|--------------------|--------------------|--------------------|--------------------|
| Degree of freedom          | 3                  | 1                  | 1                  | 3                  | 3                  | 1                  | 3                  |
| Small starch granules (%)  | 427.30**           | 8842.98**          | 288.91**           | 148.75**           | 52.64**            | 648.45**           | 106.26**           |
| Middle starch granules (%) | 6941.55**          | 263975.34**        | 1102.92**          | 2756.14**          | 4138.01**          | 66060.25**         | 1826.67**          |
| Large starch granules (%)  | 3271.13**          | 80293.20**         | 16.13**            | 227.67**           | 1016.50**          | 19124.31**         | 507.88**           |
| Volume mean diameter (μm)  | 1382.15**          | 74858.91**         | 904.36**           | 56.28**            | 902.38**           | 18672.03**         | 536.77**           |
| A chain (%)                | 348.18**           | 44.64**            | 11.38**            | 20.99**            | 9.75**             | 19.51**            | 6.56*              |
| B1 chain (%)               | 0.49 <sup>NS</sup> | 48.90**            | 0.24 <sup>NS</sup> | 0.49 <sup>NS</sup> | 4.62*              | 0.13 <sup>NS</sup> | 3.48 <sup>NS</sup> |
| B2 chain (%)               | 15.60*             | 26.22**            | 14.70**            | 2.21 <sup>NS</sup> | 1.39 <sup>NS</sup> | 1.33 <sup>NS</sup> | 2.57 <sup>NS</sup> |
| B3 chain (%)               | 97.35**            | 124.90**           | 0.00 <sup>NS</sup> | 31.99**            | 5.53*              | 6.85*              | 5.64*              |
| (A+B1)/(B2+B3)             | 43.48**            | 6.76 <sup>NS</sup> | 13.75**            | 8.80*              | 40.82**            | 34.89**            | 66.58**            |
| Amylopectin average DP     | 273.89**           | 10.54*             | 0.53 <sup>NS</sup> | 6.94*              | 9.51**             | 9.75*              | 6.88*              |
| Relative crystallinity (%) | 235.74**           | 802.71**           | 101.49**           | 7.87*              | 3.71 <sup>NS</sup> | 0.05 <sup>NS</sup> | 0.57 <sup>NS</sup> |
| Amorphous (%)              | 478.51**           | 4961.74**          | 352.59**           | 63.65**            | 6.12**             | 76.79**            | 1.44 <sup>NS</sup> |
| Single helix (%)           | 47.88**            | 7.68*              | 215.83**           | 0.42 <sup>NS</sup> | 6.06**             | 6.94*              | 4.02*              |
| Double helix (%)           | 474.32**           | 4479.71**          | 147.28**           | 56.23**            | 2.68 <sup>NS</sup> | 47.60**            | 0.30 <sup>NS</sup> |

\*F-value significant at the 0.05 probability level. \*\* F-value significant at the 0.01 probability level. NS means no significant at  $P=0.05$ .

**Table S3** Variance analysis of nitrogen (N), variety (V) and position (P) effect on starch solubility, swelling power and thermal properties.

| Index                                  | Nitrogen           | Variety   | Position | N×V                | N×P                | V×P                | N×V×P              |
|----------------------------------------|--------------------|-----------|----------|--------------------|--------------------|--------------------|--------------------|
| Degree of freedom                      | 3                  | 1         | 1        | 3                  | 3                  | 1                  | 3                  |
| Solubility (%)                         | 32.69**            | 480.04**  | 59.91**  | 30.14**            | 0.11 <sup>NS</sup> | 21.65**            | 0.49 <sup>NS</sup> |
| Swelling power (g g <sup>-1</sup> )    | 277.62**           | 5906.85** | 719.42** | 3.10 <sup>NS</sup> | 3.86*              | 0.20 <sup>NS</sup> | 6.01**             |
| ΔH <sub>gel</sub> (J·g <sup>-1</sup> ) | 3866.07**          | 33.51**   | 326.32** | 107.58**           | 17.90**            | 22.45**            | 8.31**             |
| T <sub>o</sub> (°C)                    | 16.09**            | 148.00**  | 939.69** | 990.59**           | 10.72**            | 13.73**            | 62.51**            |
| T <sub>p</sub> (°C)                    | 11.35**            | 291.01**  | 296.60** | 44.49**            | 13.71**            | 77.05**            | 7.22**             |
| T <sub>c</sub> (°C)                    | 2.09 <sup>NS</sup> | 452.34**  | 82.81**  | 36.16**            | 0.16 <sup>NS</sup> | 27.76**            | 0.09 <sup>NS</sup> |
| ΔH <sub>ret</sub> (J·g <sup>-1</sup> ) | 303.88**           | 196.72**  | 96.99**  | 18.79**            | 0.57 <sup>NS</sup> | 0.84 <sup>NS</sup> | 0.44 <sup>NS</sup> |
| R (%)                                  | 995.21**           | 96.09**   | 241.77** | 15.85**            | 1.83 <sup>NS</sup> | 0.46 <sup>NS</sup> | 0.24 <sup>NS</sup> |

\*F-value significant at the 0.05 probability level. \*\* F-value significant at the 0.01 probability level. NS means no significant at  $P=0.05$ . ΔH<sub>gel</sub>, gelatinization enthalpy; T<sub>o</sub>, onset temperature; T<sub>p</sub>, peak of gelatinization temperature; T<sub>c</sub>, conclusion temperature; ΔH<sub>ret</sub>, retrogradation enthalpies; R, retrogradation percentage.

**Table S4** Variance analysis of nitrogen (N), variety (V) and position (P) effect on starch pasting properties and rice eating quality.

| Index                    | Nitrogen | Variety            | Position           | N×V                | N×P                | V×P                | N×V×P              |
|--------------------------|----------|--------------------|--------------------|--------------------|--------------------|--------------------|--------------------|
| Degree of freedom        | 3        | 1                  | 1                  | 3                  | 3                  | 1                  | 3                  |
| Peak viscosity (cP)      | 956.84** | 2434.57**          | 8484.59**          | 102.05**           | 87.49**            | 0.37 <sup>NS</sup> | 30.43**            |
| Hot viscosity (cP)       | 490.30** | 22.29**            | 3791.95**          | 169.32**           | 53.96**            | 35.80**            | 20.11**            |
| Breakdown (cP)           | 16.02**  | 12435.96**         | 182.20**           | 1.08 <sup>NS</sup> | 0.53 <sup>NS</sup> | 66.31**            | 0.30 <sup>NS</sup> |
| Final viscosity (cP)     | 802.89** | 3381.59**          | 5219.24**          | 75.77**            | 83.23**            | 47.53**            | 11.98**            |
| Setback (cP)             | 31.33**  | 37979.77**         | 443.27**           | 4.63*              | 6.80**             | 112.22**           | 8.98**             |
| Pasting temperature (°C) | 32.56**  | 515.56**           | 36.64**            | 1.19 <sup>NS</sup> | 7.64**             | 118.94**           | 0.74 <sup>NS</sup> |
| Taste value              | 222.86** | 10127.70**         | 102.47**           | 6.51*              | 17.44**            | 16.72**            | 0.57 <sup>NS</sup> |
| Hardness (g)             | 73.74**  | 0.74 <sup>NS</sup> | 102.31**           | 0.41 <sup>NS</sup> | 0.99 <sup>NS</sup> | 1.00 <sup>NS</sup> | 1.15 <sup>NS</sup> |
| Stickiness (g)           | 69.68**  | 25.85**            | 1.04 <sup>NS</sup> | 1.17 <sup>NS</sup> | 3.25*              | 172.93**           | 1.36 <sup>NS</sup> |

\*F-value significant at the 0.05 probability level. \*\* F-value significant at the 0.01 probability level. NS means no significant at  $P=0.05$ .
